# Supplementary material
Source: PubMed Central journal article supplement (PMC6163091)
Supplement: NIHMS971158-supplement-Supp_TableS1.pdf [file NIHMS971158-supplement-Supp_TableS1.pdf]

| Structure                                                                                                          | Well | PLATE      | SYNONYMS                                                        |
|--------------------------------------------------------------------------------------------------------------------|------|------------|-----------------------------------------------------------------|
| 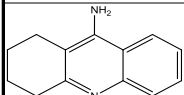 <p><chem>C13H12ClN2</chem></p>   | D10  | NGP-104-01 | CPD00059105<br>9-AMINO-1,2,3,4-TETRAHYDROACRIDINE HYDROCHLORIDE |
|  <p><chem>C18H12O7</chem></p>     | E03  | NGP-104-02 | CPD000499525<br>TAXIFOLIN-(-/-)                                 |
|  <p><chem>C17H14O3S</chem></p>    | D08  | NGP-104-02 | CPD000466331<br>ROFECOXIB                                       |
|  <p><chem>C18H12O7</chem></p>     | G11  | NGP-104-02 | CPD000466389<br>TAXIFOLIN-(+)<br>17654-26-1                     |
|  <p><chem>C18H14N2O3S</chem></p> | H04  | NGP-104-03 | CPD000466327<br>VALDECOXIB                                      |
|  <p><chem>C23H26O15</chem></p>  | E07  | NGP-104-03 | CPD000466309<br>ICARITIN                                        |
|  <p><chem>C27H26O12</chem></p>  | A09  | NGP-104-03 | CPD000466391<br>Isoquercitrin                                   |
|  <p><chem>C21H20O12</chem></p>  | D09  | NGP-104-03 | CPD000466394<br>HYPEROSIDE                                      |

|                                                                                                                               |     |            |                                                                         |
|-------------------------------------------------------------------------------------------------------------------------------|-----|------------|-------------------------------------------------------------------------|
| 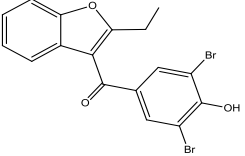 <p><math>C_{17}H_{13}Br_2O_3</math></p>     | F03 | NGP-104-05 | CPD000058310<br>3-[3,5-DIBROMO-4-HYDROXYBENZOYL]-2-ETHYLBENZOFURAN      |
|  <p><math>C_{13}H_{22}ClN_5O_5</math></p>    | F04 | NGP-104-06 | CPD000469631<br>Adenosine, N-(2-hydroxycyclopentyl)-, (1S-trans)- [CAS] |
|  <p><math>C_{13}H_{22}ClN_5O_5</math></p>    | B06 | NGP-104-06 | CPD000468732<br>CCPA                                                    |
|  <p><math>C_9H_{14}N_6</math></p>           | E10 | NGP-202-02 | CPD000058181                                                            |
|  <p><math>C_{12}H_{22}N_4O_8P_2</math></p> | A02 | NGP-202-03 | CPD000875314<br>Primaquine Diphosphate 63-45-6                          |
|  <p><math>C_{12}H_8O_4</math></p>          | F07 | NGP-202-03 | CPD000071170<br>Methoxsalen 298-81-7                                    |
|  <p><math>C_{12}H_{22}Cl_2N_2</math></p>   | H10 | NGP-202-03 | CPD000058295<br>17321-77-6                                              |
|  <p><math>C_8H_{12}N_4O_5</math></p>       | B02 | NGP-202-04 | CPD001496943<br>Ribavirin 36791-04-5                                    |
